# Supplementary material for: Stable ambipolar organic–inorganic heterojunction field-effect transistors and inverters with Cytop interlayer
Source: Royal Society of Chemistry journal article supplement (doi:10.1039/c6ra26817j), 2017-01-01
Supplement: c6ra26817j1.pdf [file c6ra26817j1.pdf]

## Supporting Information

# Stable ambipolar organic-inorganic heterojunction field-effect transistors and inverters with Cytop interlayer

Sheng Sun, Linfeng Lan\*, Yuzhi Li, Honglong Ning, Rihui Yao, Lei Wang, and Junbiao Peng

State Key Laboratory of Luminescent Materials and Devices (South China University of Technology),  
Wushan Road 381#, Tianhe District, Guangzhou, China.

E-mail: [lanlinfeng@scut.edu.cn](mailto:lanlinfeng@scut.edu.cn)

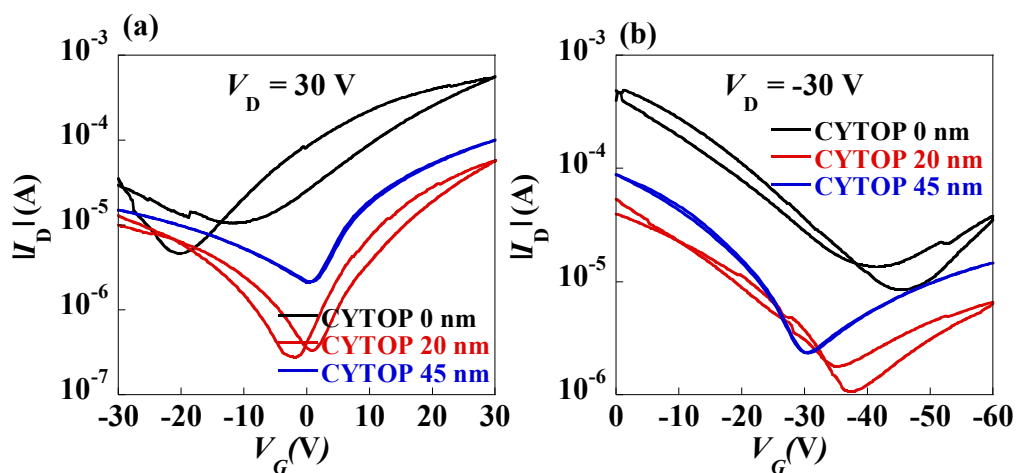

**Figure S1.** Transfer curves of ambipolar FETs depend on different Cytop thickness: (a) in electron enhancement mode and (b) in hole enhancement mode.

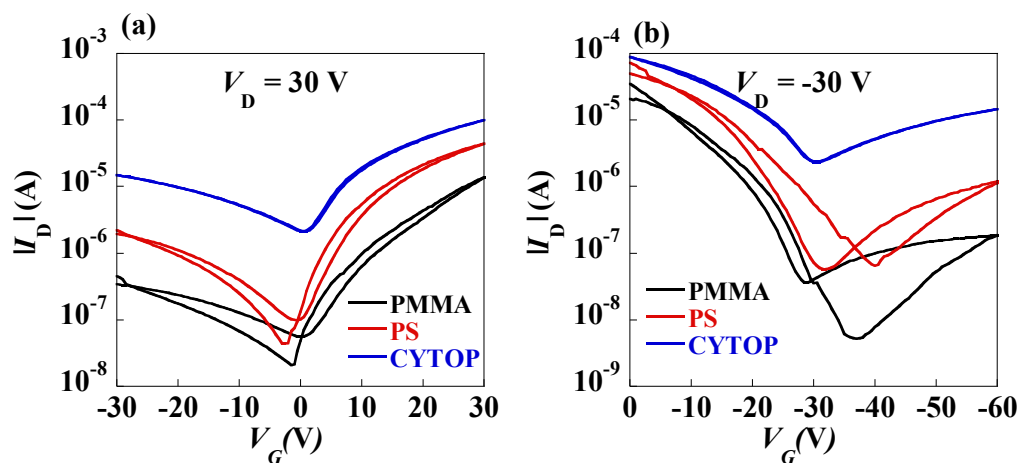

**Figure S2.** Transfer curves of ambipolar FETs with different modification layer (PMMA, PS or Cytop): (a) in electron enhancement mode and (b) in electron enhancement mode.

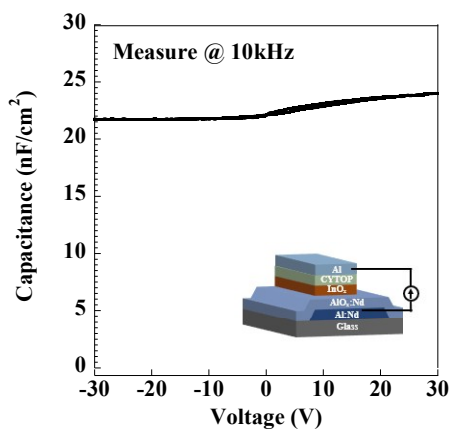

**Figure S3.** Capacitance vs. gate voltage plots measured at 10kHz for  $\text{AlO}_x\text{:Nd}/\text{InO}_x/\text{Cytop}$ ; inset: the structures of the capacitance.
